# Supplementary material
Source: HighWire-hosted journal article supplement (https://ard.bmj.com/highwire/filestream/202481/field_highwire_adjunct_files/3/Table_S2.xlsx)
Supplement: Table_S2.xlsx [file Table_S2.xlsx]

## Sheet: Feuil1
	Supplemental Table 2. Primers used in the amplification and sequencing of HLA-E, HLA-F, and HLA-G.
	gene	primer name	primer sequence	reference
	HLA-E	ex2F	5'‐TGAAGTATTTCCACACTTCCGTGTCCCGGCC‐3'	(27)
		ex2R	5'‐AATCTGGGACCCGAAGATTCGAGGGGACCC‐3'	(27)
		ex3F	5'‐CAAAATGCCCACAGGGTGGTGGCGACGGG‐3'	(27)
		ex3R	5'‐GGAGATGGGAGAGTAGCCCTGTGGACCCTC‐3'	(27)
	HLA-F	ex1F	5'‐GCAGTTCCCAGGTTCTAAAGTCC‐3'	this study
		ex1R	5'‐CAGAGGCCGTTTCTCTCTGG‐3'	this study
		ex2F	5'‐CACTCCTTGAGGTATTTCAGCACC‐3'	this study
		ex2R	5'‐GTGGTCCACTCCCAATACTGC‐3'	this study
		ex4F	5'‐GACACAGAGCTTGTGGAGACC‐3'	this study
		ex4R	5'‐CTGACCCTGCTGAAGAGCTC‐3'	this study
		ex7F	5'‐CCACAGTTCCTCTAGCCACATC‐3'	this study
		ex7R	5'‐GCTTCTCAGTCCCACACAAG‐3'	this study
	HLA-G	ex2F	5'‐TCCATGAGGTATTTCAGCGC‐3'	(28)
		ex2R	5'‐TCCGTGGGGCATGGAGGT‐3'	(29)
		ex3F	5'‐CCCAGACCCTCTACCTGGGAGA‐3'	(29)
		ex3R	5'‐CTCTCCTTGTGCTAGGCCAGGCTGAGAGG‐3'	(29)
		ex4F	5'‐CCATGAGAGATGCAAAGTGCT‐3'	(29)
		ex4R	5'‐TGCTTTCCCTAACAGACATGAT‐3'	(29)
		ex8F	5'‐GTGATGGGCTGTTTAAAGTGTCACC‐3'	(29)
		ex8R	5'‐GGAAGGAATGCAGTTCAGCATGA‐3'	(29)
